# Supplementary material
Source: publisher figshare collection journal article supplement (https://future-science-group.figshare.com/ndownloader/files/34480493)
Supplement: Supplementary file 1 [file 34480493]

**Rescue of susceptibility to second-line drugs in resistant clinical isolates of *Mycobacterium tuberculosis***

Camila Maringolo Ribeiro1, Júlia Araújo Grecco1, Débora Lourenço Bellato1, Aryadne Larissa de Almeida2, Vanessa Pietrowski Baldin2, Katiany Rizzieri Caleffi-Ferracioli2 & Fernando Rogério Pavan1,*.

1 São Paulo State University (UNESP), School of Pharmaceutical Sciences, Tuberculosis Research Laboratory, Araraquara, São Paulo, Brazil.

2 State University of Maringá (UEM), Department of Clinical Analysis and Biomedicine, Maringá, Paraná, Brazil.

* Corresponding author: Department of Biological Sciences, School of Pharmaceutical Sciences, Rodovia Araraquara-Jaú, Km 01, Campos Ville, CEP 14800-903, Araraquara-SP, Brazil. Phone +55 16 33014671. E-mail address: fernando.pavan@unesp.br.

**Supplementary material**

The EtBr accumulation assay results of CF110, CF 169 and H37Rv are presented in **Supplementary figures 1, 2 and 3.**

**Supplementary figure 1.** Relative fluorescence due to the accumulation of ethidium bromide in the clinical isolate of *Mycobacterium tuberculosis* CF 110 after different pretreatments and in the presence of efflux pump inhibitors.


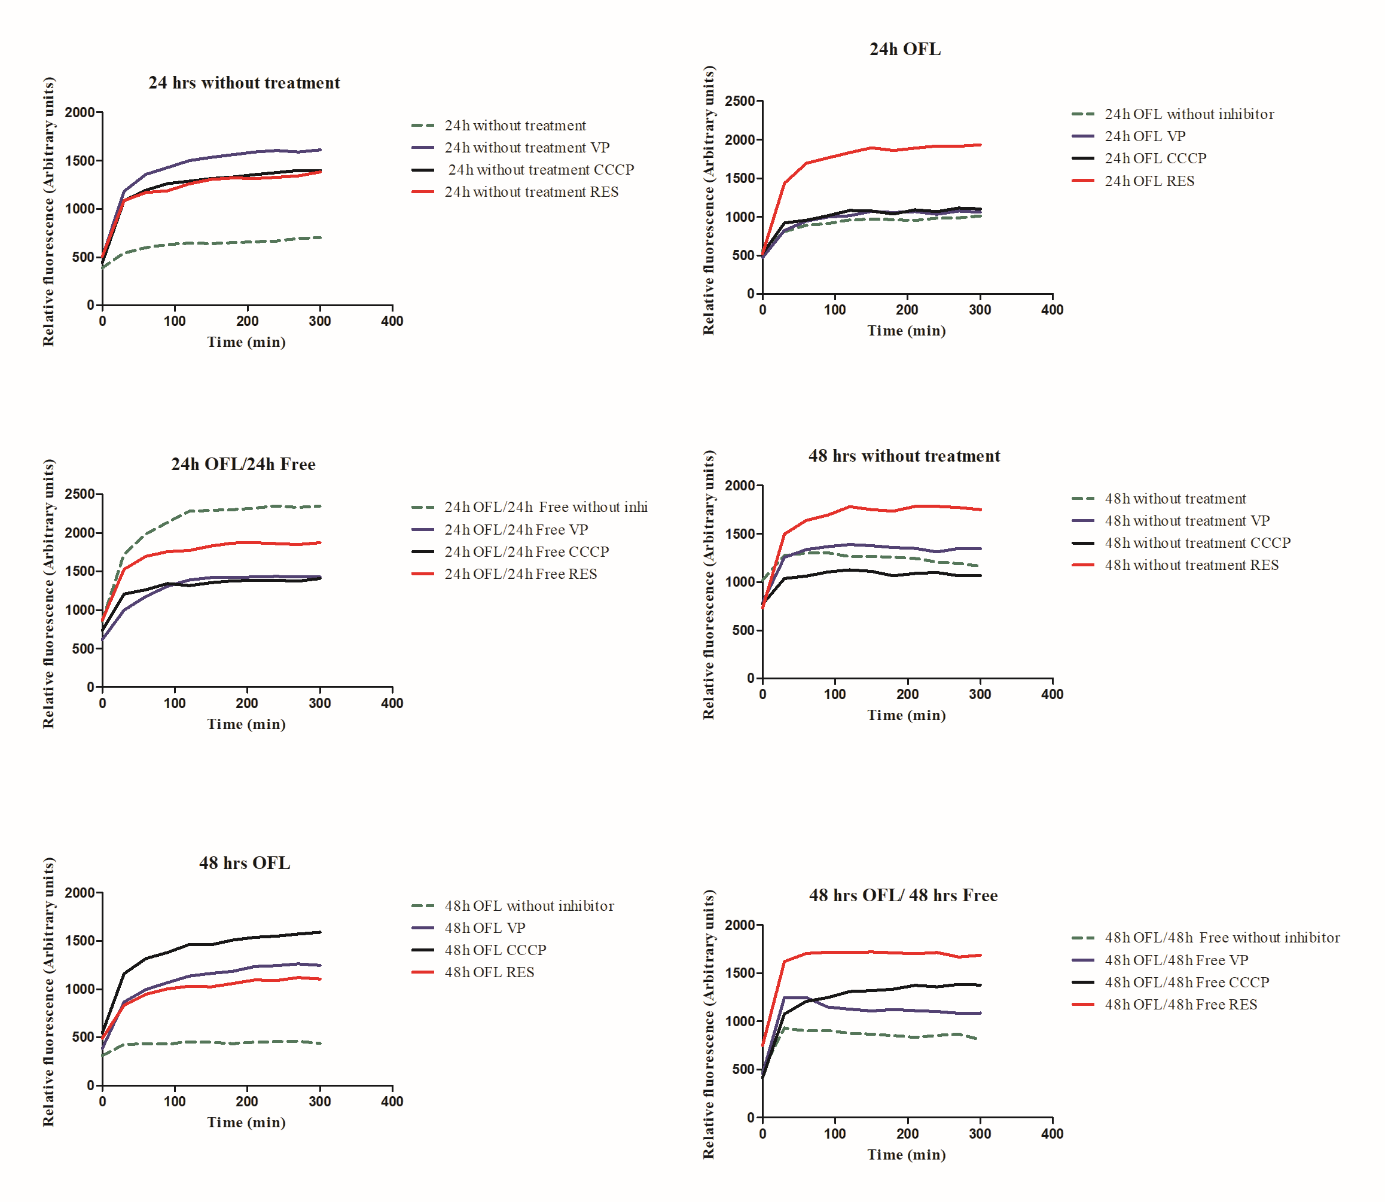


CCCP = m-chlorophenyl hydrazine; VP = verapamil; RES = reserpine; OFL = ofloxacin. The results are the mean of two independent assays.

**Supplementary figure 2.** Relative fluorescence due to the accumulation of ethidium bromide in the clinical isolate of *Mycobacterium tuberculosis* CF 169 after different pretreatments and in the presence of efflux pump inhibitors.

**
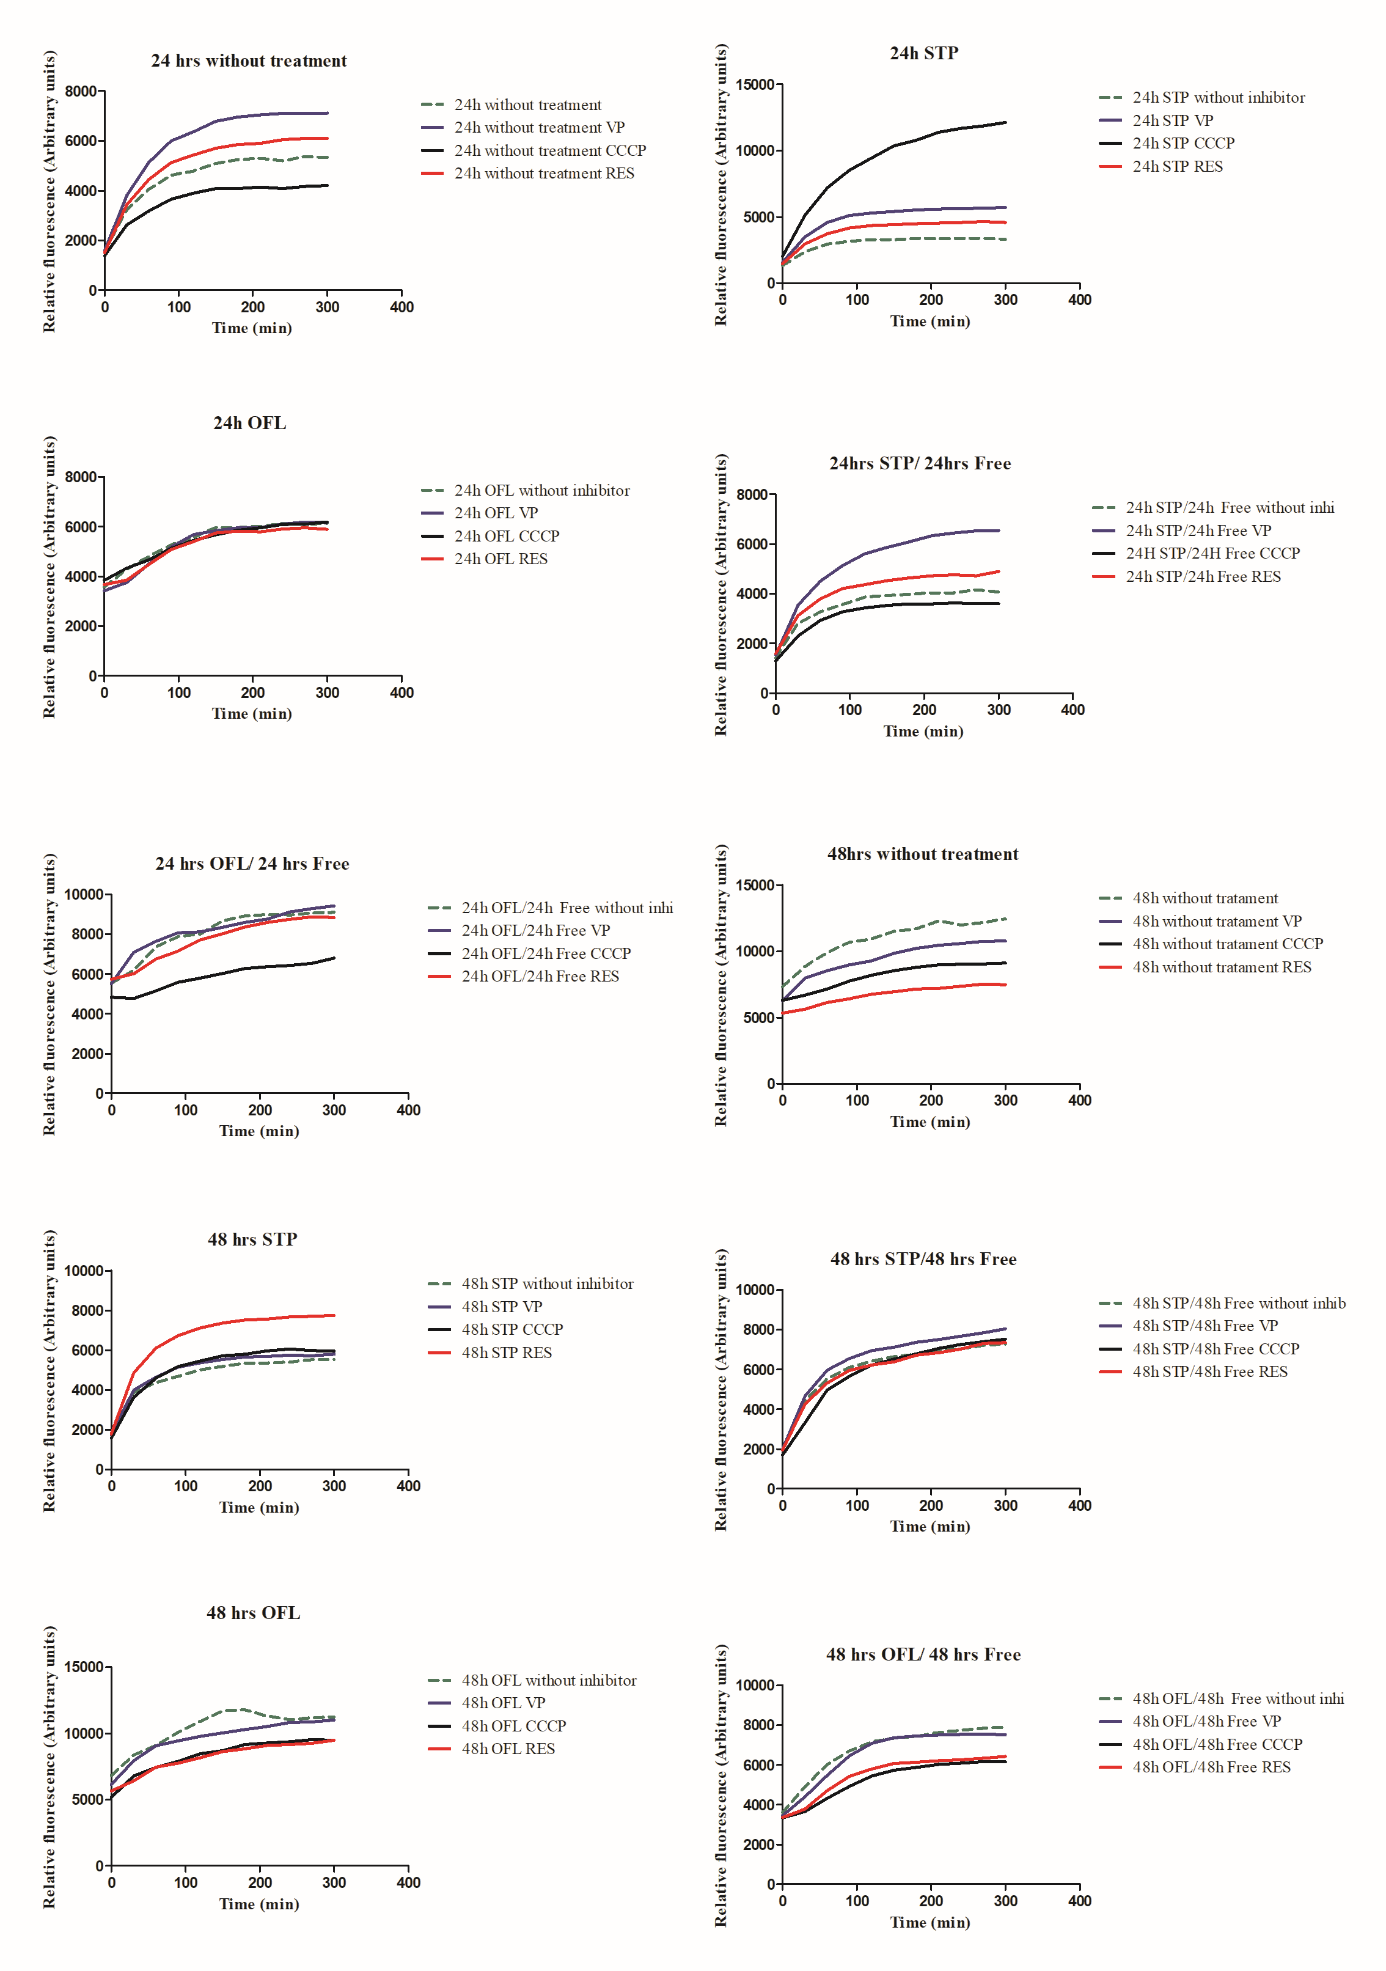
**

CCCP = m-chlorophenyl hydrazine; VP = verapamil; RES = reserpine; OFL = ofloxacin;

STP = streptomycin. The results are the mean of two independent assays.

**Supplementary figure 3.** Relative fluorescence due to the accumulation of ethidium bromide in the laboratorial strains of *Mycobacterium tuberculosis* H37Rv after different pretreatments and in the presence of efflux pump inhibitors.

**
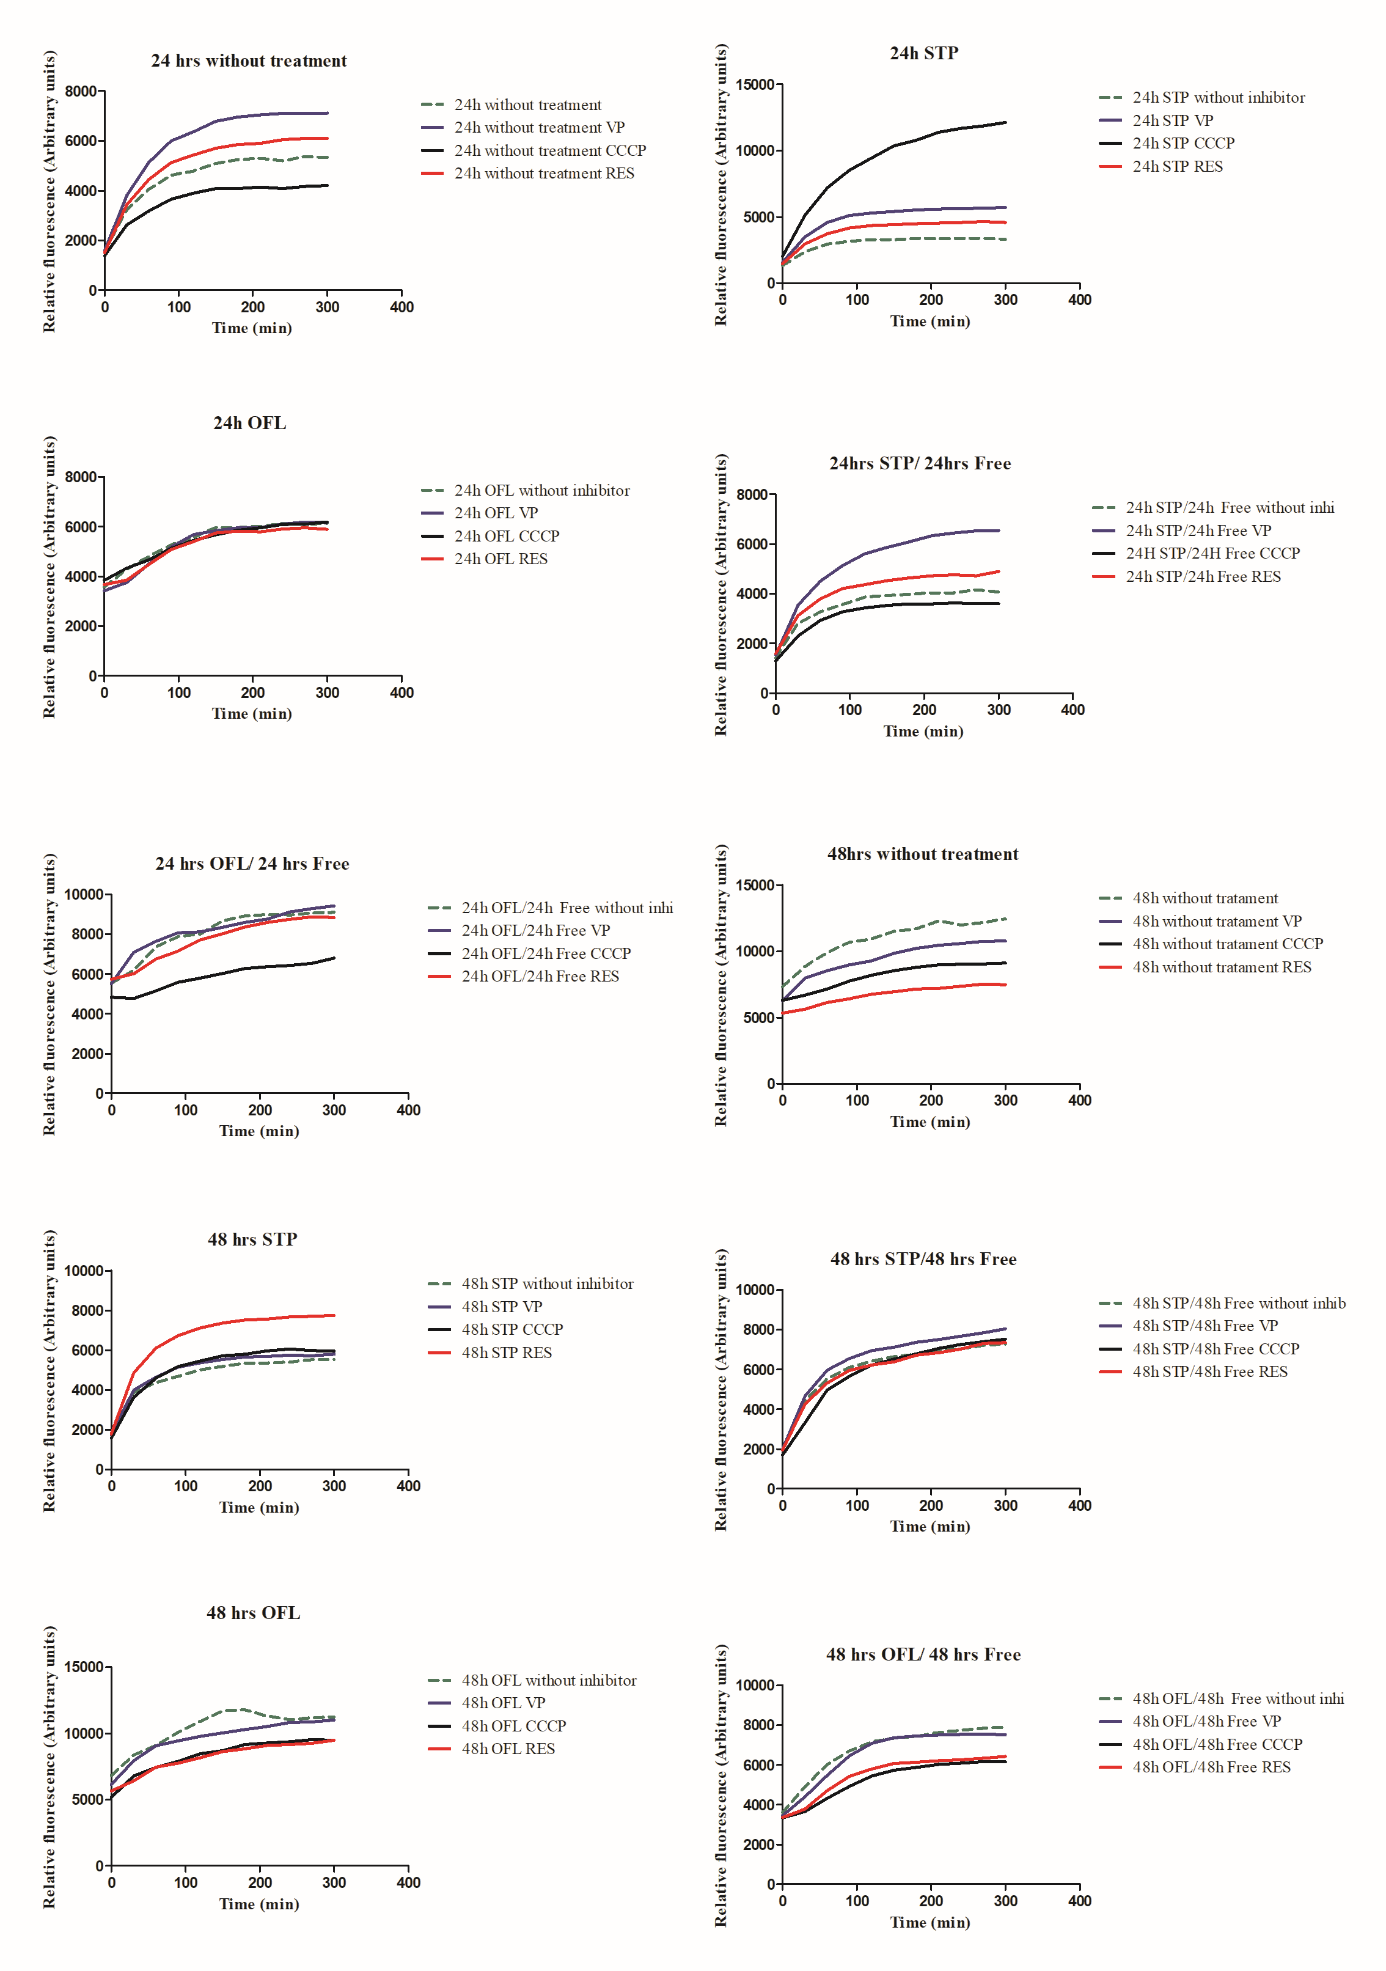
**

CCCP = m-chlorophenyl hydrazine; VP = verapamil; RES = reserpine; OFL = ofloxacin;

STP = streptomycin. The results are the mean of two independent assays.
